# Supplementary material
Source: PubMed Central journal article supplement (PMC3308346)
Supplement: NIHMS359566-supplement-Supplementary_Data.pdf [file NIHMS359566-supplement-Supplementary_Data.pdf]

# Supplementary information for “Refined homology model of monoacylglycerol lipase: Toward a selective inhibitor”

*Anna L. Bowman and Alexandros Makriyannis*

| Name     | Structure                                                                           | IC <sub>50</sub> | Reference |
|----------|-------------------------------------------------------------------------------------|------------------|-----------|
| AM6701   | 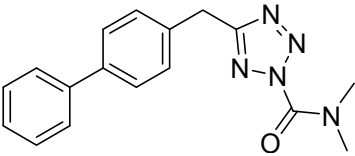   | 0.9 nM           | [1, 2]    |
| MAFP     |    | 5 nM             | [3]       |
| JZL184   |   | 6 nM             | [4]       |
| AM6702   |  | 9 nM             | [1, 2]    |
| CAY10499 |  | 0.4 μM           | [5]       |
| 8        |  | 0.41 μM          | [6]       |

|        |                                                                                    |                                                |          |
|--------|------------------------------------------------------------------------------------|------------------------------------------------|----------|
| 1      | 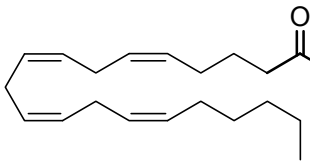  | 4.5 $\mu\text{M}$                              | [7]      |
| 5      |   | 5.6 $\mu\text{M}$                              | [7]      |
| 19     |   | 5.7 $\mu\text{M}$                              | [8]      |
| ATFMK  |   | 66 $\mu\text{M}$                               | [9]      |
| URB602 |   | 28 $\mu\text{M}$ [10]<br>75 $\mu\text{M}$ [11] | [10, 11] |
| O-2203 |  | 90 $\mu\text{M}$                               | [12]     |

- Zvonok N, Williams J, Johnston M, Panarinathan L, Karageorgos I, Janero DR, Krishnan SC, Makriyannis A (2008) *Chem Biol* 15:854
- Ortar G, Cascio MG, Moriello AS, Camalli M, Morera E, Nalli M, Di Marzo V (2008) *Eur J Med Chem* 43:62
- Goparaju SK, Ueda N, Yamaguchi H, Yamamoto S (1998) *FEBS Lett* 422:69
- Long JZ, Li W, Booker L, Burston JJ, Kinsey SG, Schlosburg JE, Pavón FJ, Serrano AM, Selley DE, Parsons LH, Lichtman AH, Cravatt BF (2009) *Nat Chem Biol* 5:37
- Muccioli GG, Labar G, Lambert DM (2008) *Chembiochem* 9:2704
- Ortar G, Bisogno T, Ligresti A, Morera E, Nalli M, Di Marzo V (2008) *J Med Chem* 51:6970
- Cisneros JA, Vandevoorde S, Ortega-Gutierrez S, Paris C, Fowler CJ, Lopez-Rodriguez ML (2007) *J Med Chem* 50:5012
- Kapanda CN, Muccioli GG, Labar G, Draoui N, Lambert DM, Poupaert JH (2009) *Med Chem Res* 18:243
- Saario SM, Savinainen JR, Laitinen JT, Jarvinen T, Niemi R (2004) *Biochem Pharmacol* 67:1381
- Hohmann AG, Suplita RL, Bolton NM, Neely MH, Fegley D, Mangieri R, Krey JF, Walker JM, Holmes PV, Crystal JD, Duranti A, Tontini A, Mor M, Tarzia G, Piomelli D (2005) *Nature* 435:1108
- Makara JK, Mor M, Fegley D, Szabo SI, Kathuria S, Astarita G, Duranti A, Tontini A, Tarzia G, Rivara S, Freund TF, Piomelli D (2005) *Nat Neurosci* 8:1139
- Ghafouri N, Tiger G, Razdan RK, Mahadevan A, Pertwee RG, Martin BR, Fowler CJ (2004) *Br J Pharmacol* 143:774
